# Supplementary material for: Skeletal Muscle Remodelling as a Function of Disease Progression in Amyotrophic Lateral Sclerosis
Source: Hindawi journal article supplement (doi:10.1155/2016/5930621), 2016-01-01
Supplement: f1 [file 5930621.f1.pdf]

## Supporting information

Table S1: The primers used to investigate mRNA expression levels, their ID numbers, function and analysis method.

| Gene name   | ID            | Function                                                         | Run by   |
|-------------|---------------|------------------------------------------------------------------|----------|
| MYF5        | Hs00929416_g1 | Early myogenic marker                                            | 96-well  |
| PAX7        | Hs00242962_m1 | Early myogenic marker                                            | 96-well  |
| CDKN1A/P21  | Hs00355782_m1 | Cell cycle regulator                                             | 96-well  |
| CDKN1B/P27  | Hs01597588_m1 | Cell cycle regulator                                             | 96-well  |
| SMAD3       | Hs00969210_m1 | Role in muscle growth                                            | 96-well  |
| IGF1        | HS01547656_m1 | Role in muscle growth                                            | 96-well  |
| RPLP0       | HS99999902_m1 | Reference gene                                                   | 96-well  |
| GAPDH       | HS99999905_m1 | Reference gene                                                   | 96-well  |
| ACTA1       | Hs00559403_m1 | Muscle specific actin                                            | LDA card |
| CDRNA1      | Hs00175578_m1 | Acetylcholine receptor subunit, denervated muscle                | LDA card |
| GDNF        | Hs01931883_s1 | Glial cell-derived neurotrophic factor, motor neurons            | LDA card |
| CDK5        | Hs00358991_g1 | Cell division protein kinase 5, neuronal maturation              | LDA card |
| MYOG        | Hs01072232_m1 | Late myogenic marker                                             | LDA card |
| MYOD1       | Hs02330075_g1 | Late myogenic marker                                             | LDA card |
| NCAM        | Hs00941830_m1 | Expressed in satellite cells, regenerating and denervated fibres | LDA card |
| CD68        | Hs02836816_g1 | Expressed on monocytes/macrophages                               | LDA card |
| PTPRC /CD45 | Hs04189704_m1 | Expressed in hematopoietic cells                                 | LDA card |
| RPLP0       | HS99999902_m1 | Reference gene                                                   | LDA card |
| GAPDH       | HS99999905_m1 | Reference gene                                                   | LDA card |
